# Supplementary material for: Photochemically-assisted synthesis and photophysical properties of difluoroboronated β-diketones with fused four-benzene-ring chromophores, chrysene and pyrene
Source: Royal Society of Chemistry journal article supplement (doi:10.1039/c6pp00089d), 2016-06-03
Supplement: c6pp00089d1.pdf [file c6pp00089d1.pdf]

The Electronic Supplementary Information for

## **Photochemically assisted synthesis and photophysical properties of difluoroboronated $\beta$ -diketones having fused four benzene rings; chrysene and pyrene**

Michitaka Mamiya,<sup>1</sup> Yurie Suwa<sup>1</sup> and Hideki Okamoto<sup>2</sup> and Minoru Yamaji,<sup>3,\*</sup>

<sup>1</sup> Education Program of Materials and Bioscience, Graduate School of Science and Engineering, Gunma University, Kiryu, Gunma 376-8515, Japan

<sup>2</sup> Division of Earth, Life, and Molecular Sciences, Graduate School of Natural Sciences and Technology, Okayama University, Okayama 700-8530, Japan

<sup>3</sup> Division of Molecular Science, Graduate School of Science and Engineering, Gunma University, Kiryu, Gunma 376-8515, Japan

### **Contents**

**1. Procedure for preparing compounds, 1-ChB, 3-ChB and 1-PyB (p. 2–7)**

**2. Absorption and fluorescence spectra in MeCN (p. 8)**

**3. Absorption and fluorescence spectra in DMSO (p. 9)**

**4. Decay profiles of fluorescence (p. 10)**

**5. Lippert-Mataga analysis data (p. 11–12)**

**6. Transient absorption spectra in MeCN (p. 13)**

**7. Results of DFT and TD-DFT calculations (absorption spectra, atom coordinates and sum of electronic and zero-point energies) (p. 14–20)**

**8. <sup>1</sup>H and <sup>13</sup>C NMR spectra of new compounds (p. 21–28)**

## 1. Procedure for preparing compounds, 1-ChB, 3-ChB and 1-PyB

### 1.1. Preparation of 1-ChB

#### 1.1.1 Preparation of compound 1

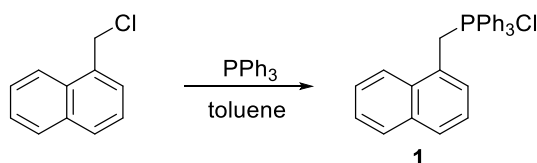

To 200 ml toluene, 1-chloromethylnaphthalene (3.5 g, 20 mmol) and triphenylphosphine (6.3 g, 24 mmol) were added, and the solution was refluxed for 24 h. The precipitate was filtered, washed with benzene and dried in vacuo. Compound **1** (1.9 g, 22 %) was obtained.<sup>1</sup>

#### 1.1.2 Preparation of compound 2

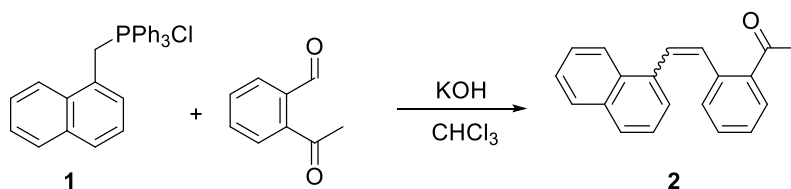

To 60 ml chloroform solution of compound **1** (3.1 g, 7.0 mmol) and 2-acetylbenzaldehyde (1.0 g, 6.8 mmol), 30 ml of aqueous KOH (50 %) was dropwise added. After the solution was stirred for 2 h at room temperature, 100 ml chloroform was added. The organic layer was separated, washed with brine, and evaporated under reduced pressure. The product **2** was obtained after silica gel chromatography using hexane/ethyl acetate (9:1, v/v) as a mixture of *E*- and *Z*-isomers (1.8 g, 99 %). The mixture was used in the following photoreaction without further separation and purification.

#### 1.1.3 Synthesis of compound 4

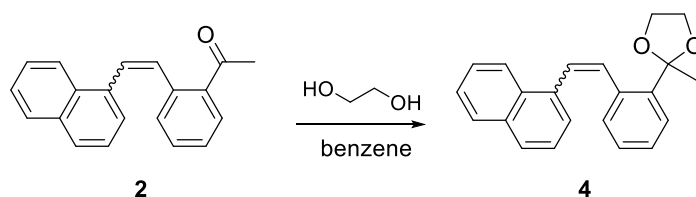

To 200 ml of benzene, compound **2** (1.8 g, 6.7 mmol), 30 ml ethylene glycol and *p*-toluenesulfonic acid (0.92 g, 4.8 mmol) were added, the solution was refluxed for 48 h. After cooling to room temperature, the solution was washed with water and brine. The product was separated by silica-gel chromatography using hexane / ethyl acetate (9:1, v/v) providing compound **4** (2.0 g, 98 %).

#### 1.1.4 Synthesis of compound 6.

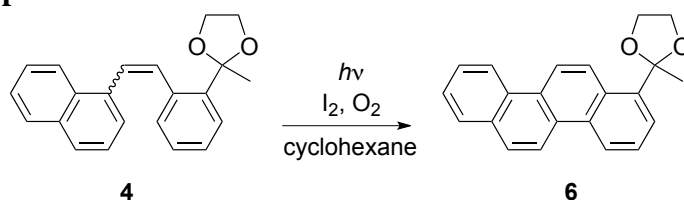

A cyclohexane solution (1000 ml) of compound **4** (1.2 g, 3.8 mmol) and 50 mg of I<sub>2</sub> was photolyzed using with a home-made microflow photoreactor.<sup>2</sup> The photolyzed solution was washed with aqueous Na<sub>2</sub>S<sub>2</sub>O<sub>3</sub> and brine. After usual work-up, compound **6** was obtained (1.2 g, 99 %). <sup>1</sup>H NMR (CDCl<sub>3</sub>, 400 MHz) δ<sub>H</sub> = 8.83-8.69 (m, 5H), 8.00-7.98 (m, 2H), 7.93 (dd, 1H, *J* = 0.9, 7.3), 7.73-7.61 (m, 3H), 4.16-4.13 (m, 2H), 3.88-3.84 (m, 2H), 1.97 (s, 3H). Since the acetal **6** was hydrolyzed during separation by silica-gel chromatography, it was used the following deprotection without purification.

### 1.1.5 Synthesis of compound **8**

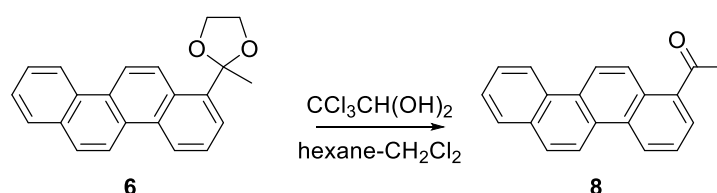

Compound **6** (300 mg, 1.0 mmol) and chloral hydrate (1.0 g, 6.6 mmol) were added in a mixture of 5 ml hexane and 3.4 ml CH<sub>2</sub>Cl<sub>2</sub>. The solution was stirred at room temperature under N<sub>2</sub> atmosphere for 5 h. After adding CH<sub>2</sub>Cl<sub>2</sub> (100 ml), the solution was washed with water and brine. After evaporating the solvent, the residue was chromatographed on silica-gel using hexane/ethyl acetate (3:1, v/v) to give compound **8** (200 mg, 74 %). mp 207–208 °C. <sup>1</sup>H NMR (600 MHz, CDCl<sub>3</sub>) δ<sub>H</sub> = 8.98 (d, 1H, *J* = 8.4 Hz), 8.82 (m, 2H), 8.80 (d, 1H, *J* = 8.4 Hz), 8.70 (d, 1H, *J* = 9.2 Hz), 8.04–8.00 (m, 3H), 7.78–7.70 (m, 2H), 7.67 (ddd, 1H, *J* = 7.7, 6.9, 1.4 Hz), 2.82 (s, 3H). <sup>13</sup>C NMR (150 MHz, CDCl<sub>3</sub>) δ<sub>C</sub> = 202.6, 136.7, 132.4, 131.4, 130.4, 129.3, 128.6, 128.3, 128.13, 128.07, 127.9, 127.5, 127.1, 126.9, 125.3, 124.5, 123.42, 123.40, 121.2, 30.6; HRMS (FAB-TOF) *m/z* calcd. for C<sub>20</sub>H<sub>14</sub>O 270.1045 [M<sup>+</sup>], found 270.1046.

### 1.1.6 Synthesis of compound **11**

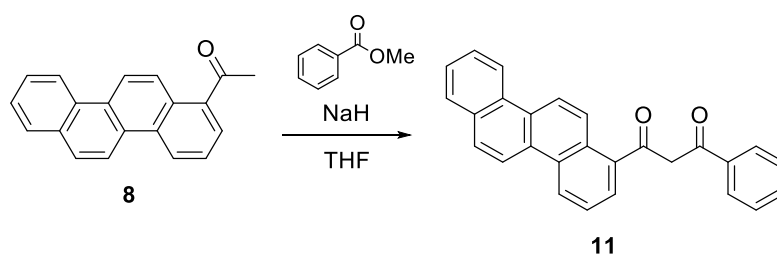

To 15 ml of dry THF, **8** (260 mg, 1.0 mmol) and NaH (60 % in oil, 1.0 g, 25 mmol) were added, and the mixture was stirred for 30 min at 0 °C. Methyl benzoate (0.25 ml, 2.0 mmol) was added to the solution, which was refluxed for 2 h. After cooling to room temperature, aqueous NH<sub>4</sub>Cl (20 %, 30 ml) was added. The product was extracted with ethyl acetate, and the solution was washed with aqueous NH<sub>4</sub>Cl and brine. The product was purified by silica-gel chromatography using hexane / ethyl acetate (9:1, v/v) to give **11** (130 mg, 36 %). mp 247–248 °C. <sup>1</sup>H NMR (600 MHz, CDCl<sub>3</sub>) δ<sub>H</sub> = 16.83 (s, 1H), 8.98 (d, 1H, *J* = 8.4 Hz), 8.85–8.79 (2H, two doublets overlapped), 8.74 (d, 1H, *J* = 9.2 Hz), 8.67 (d, 1H, *J* = 9.3 Hz), 8.05 (d, 1H, *J* = 9.2 Hz), 8.03–8.00 (m, 3H), 7.94 (dd, 1H, *J* = 7.2, 1.0 Hz), 7.77 (dd, 1H, *J* = 8.4, 7.2 Hz), 7.74 (ddd, 1H, *J* = 8.0, 7.0, 1.2 Hz), 7.67 (ddd, 1H, *J* = 8.0, 7.0, 1.0 Hz), 7.58 (m, 1H), 7.50 (m, 1H). <sup>13</sup>C NMR (150 MHz, CDCl<sub>3</sub>) δ<sub>C</sub> = 190.8, 184.5, 135.8, 135.0, 132.6, 132.2, 131.1, 130.3, 129.1, 128.7, 128.5, 128.2, 128.1, 127.8, 127.2, 127.0, 126.9, 126.7, 126.4, 125.7, 124.3, 123.2, 122.6, 121.1, 98.6; HRMS (FAB-TOF) *m/z* calcd. for C<sub>27</sub>H<sub>18</sub>O<sub>2</sub> 374.1307 [M<sup>+</sup>], found 374.1336.

## 1.1.7 Synthesis of 1-ChB

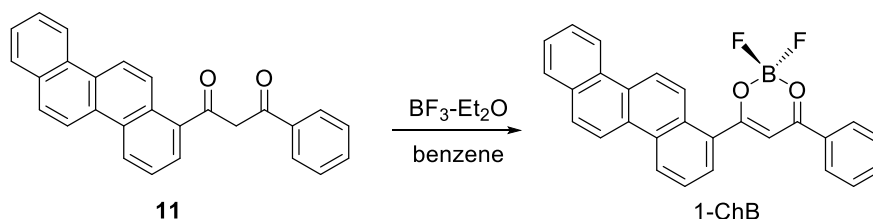

Compound **11** (70 mg, 0.19 mmol) and a Et<sub>2</sub>O solution of boron trifluoride diethyl etherate (46 %, 0.1 ml, 0.37 mmol) were added to 5 ml of benzene, and the solution was refluxed for 1 h. The product was purified by silica-gel chromatography using hexane / ethyl acetate (3:1, v/v) to give 1-ChB (66 mg, 83 %). mp 267–268 °C. <sup>1</sup>H NMR (600 MHz, DMSO-*d*<sub>6</sub>)  $\delta_{\text{H}}$  = 9.41 (d, 2H, *J* = 8.4 Hz), 9.15 (d, 2H, *J* = 9.5 Hz), 9.03–8.98 (2H, two doublets overlapped), 8.65 (d, 1H, *J* = 9.5 Hz), 8.43 (m, 2H), 8.21 (d, 1H, *J* = 9.1 Hz), 8.15 (dd, 1H, *J* = 7.8, 1.0 Hz), 7.97 (dd, 1H, *J* = 8.4, 7.3 Hz), 7.89 (s, 1H), 7.88 (ddd, 1H, *J* = 8.2, 7.0, 1.0 Hz), 7.77 (ddd, 1H, *J* = 7.8, 7.0, 1.0 Hz), 7.71 (m, 2H). <sup>13</sup>C NMR (150 MHz, DMSO-*d*<sub>6</sub>)  $\delta_{\text{C}}$  = 187.1, 183.0, 136.2, 132.0, 131.2, 131.0, 130.8, 130.6, 130.0, 129.7, 129.6, 129.5, 129.0, 128.5, 128.4, 127.9, 127.8, 127.4, 127.3, 126.2, 124.3, 123.7, 123.3, 121.5, 99.4; HRMS (FAB-TOF) *m/z* calcd. for C<sub>27</sub>H<sub>17</sub>BF<sub>2</sub>O<sub>2</sub> 422.1290 [M<sup>+</sup>], found 422.1303.

## 1.2 Synthesis of 3-ChB

### 1.2.1 Preparation of compound 3

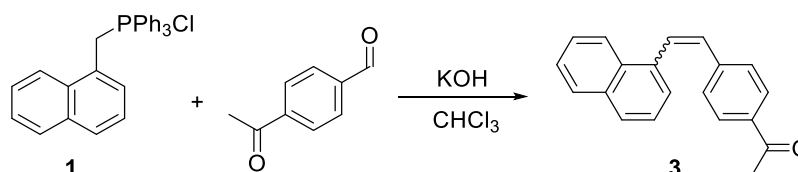

To 60 ml chloroform solution of compound **1** (3.1 g, 7.0 mmol) and 4-acetylbenzaldehyde (1.0 g, 6.8 mmol), 30 ml of aqueous KOH (50 %) was dropwise added. After the solution was stirred for 2 h at room temperature, 100 ml chloroform was added. The organic layer was separated, washed with brine, and evaporated under reduced pressure. The product **3** was obtained after silica gel chromatography using hexane/ethyl acetate (9:1, v/v) as a mixture of *E*- and *Z*-isomers (1.8 g, 99 %). The mixture was used in the following photoreaction without further separation and purification.

### 1.2.2 Synthesis of compound 5.

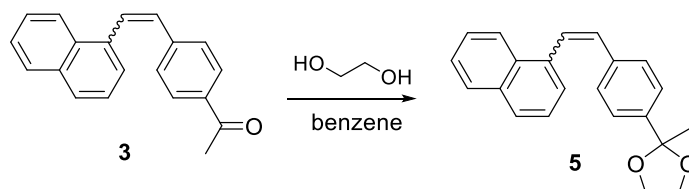

To 200 ml of benzene, compound **3** (1.8 g, 6.7 mmol), 30 ml ethylene glycol and *p*-toluenesulfonic acid (0.92 g, 4.8 mmol) were added, the solution was refluxed for 48 h. After cooling to room temperature, the solution was washed with water and brine. The product **5** was separated by silica-gel chromatography using hexane/ethyl acetate (9:1, v/v) providing compound (2.0 g, 98 %).

### 1.2.3 Synthesis of compound 7.

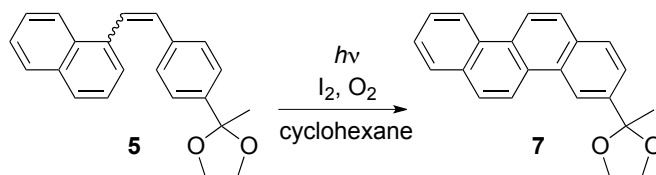

A cyclohexane solution (1000 ml) of compound **5** (1.2 g, 3.8 mmol) and 50 mg  $I_2$  was photolyzed using with a home-made microflow photoreactor.<sup>2</sup> The photolyzed solution was washed with aqueous  $Na_2S_2O_3$  and brine. After usual work-up, compound **7** was obtained (1.2 g, 99 %).  $^1H$  NMR ( $CDCl_3$ , 400 MHz)  $\delta_H$  = 9.43 (s, 1H), 8.85-8.79 (m, 3H), 8.17 (dd, 1H,  $J$  = 1.6, 8.5), 8.09-7.99 (m, 4H), 7.67-7.61 (m, 2H), 4.15-4.12 (m, 2H), 3.90-3.86 (m, 2H), 1.83 (s, 3H). Since the acetal **7** was hydrolyzed during separation by silica-gel chromatography, it was used the following deprotection without purification.

### 1.2.4 Synthesis of compound 9

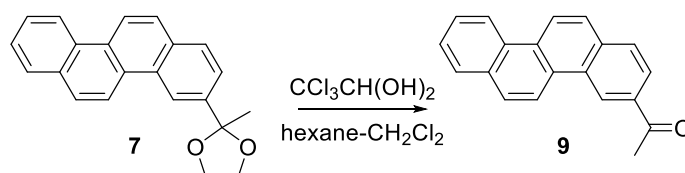

Compound **7** (610 mg, 1.9 mmol) and chloral hydrate (2.1 g, 13 mmol) were added to a mixture of 8 ml of hexane and 8 ml of  $CH_2Cl_2$ . The solution was stirred at room temperature under  $N_2$  atmosphere for 5 h. After adding  $CH_2Cl_2$  (100 ml), the solution was washed with water and brine. After evaporating the solvent, the residue was chromatographed on silica-gel using hexane / ethyl acetate (3:1, v/v) to give **9** (387 mg, 79 %). mp 155–159 °C.  $^1H$  NMR (600 MHz,  $CDCl_3$ )  $\delta_H$  = 9.41 (bs, 1H), 8.82 (d, 1H,  $J$  = 9.1), 8.80–8.76 (2H, two doublets overlapped), 8.17 (dd, 1H,  $J$  = 8.7, 1.7 Hz), 8.07 (d, 1H,  $J$  = 9.1 Hz), 8.05–8.00 (m, 3H), 7.74 (ddd, 1H,  $J$  = 8.3, 7.7, 1.4 Hz), 7.67 (ddd, 1H,  $J$  = 7.7, 7.0, 1.0 Hz).  $^{13}C$  NMR (150 MHz,  $CDCl_3$ )  $\delta_C$  = 198.4, 135.0, 134.9, 132.4, 130.5, 130.0, 129.08, 129.05, 128.8, 128.7, 128.3, 127.1, 126.91, 129.85, 125.1, 124.8, 124.1, 123.2, 121.0, 27.1; HRMS (FAB-TOF)  $m/z$  calcd. for  $C_{20}H_{14}O$  270.1045 [ $M^+$ ], found 270.1073.

### 1.2.5 Preparation of compound 12

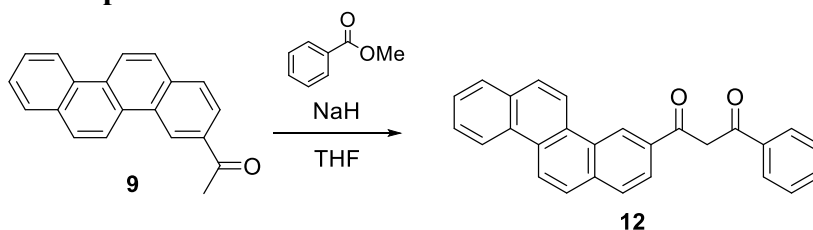

To 20 ml of dry THF, compound **9** (400 mg, 1.5 mmol) and NaH (60 % in oil, 1.5 g, 38 mmol) were added, and the mixture was stirred for 10 min at room temperature. Methyl benzoate (0.25 ml, 2.0 mmol) was added to the solution, which was refluxed for 3 h. After cooling to room temperature, aqueous  $NH_4Cl$  (20 %, 30 ml) was added. The product was extracted with ethyl acetate, and the solution was washed with aqueous  $NH_4Cl$  and brine. The product was purified by silica-gel chromatography using hexane/ethyl acetate (9:1, v/v) to give compound **12** (230 mg, 41 %). mp 217–220 °C.  $^1H$  NMR (600 MHz,  $CDCl_3$ )  $\delta_H$  = 17.10 (s, 1H), 9.47 (s, 1H), 8.85–8.80 (2H, two

doublets overlapped), 8.78 (d, 1H,  $J = 8.2$  Hz), 8.15 (d, 1H,  $J = 8.1$  Hz), 8.10–8.00 (m, 6H), 7.74 (ddd, 1H,  $J = 8.2, 7.5, 1.0$ ), 7.67 (t, 1H,  $J = 7.5$  Hz), 7.60 (m, 1H), 7.54 (m, 2H), 7.09;  $^{13}\text{C}$  NMR (150 MHz,  $\text{CDCl}_3$ )  $\delta_{\text{C}} = 186.1, 185.8, 135.8, 134.6, 133.4, 132.7, 132.5, 130.6, 130.3, 129.1, 129.0, 128.9, 128.83, 128.80, 1288.2, 127.4, 127.1, 126.9, 126.9, 124.1, 123.8, 123.4, 123.3, 121.2, 93.8$ ; HRMS (FAB-TOF)  $m/z$  calcd. for  $\text{C}_{27}\text{H}_{18}\text{O}_2$  374.1307 [ $\text{M}^+$ ], found 374.1287.

## 1.2.6 Synthesis of 3-ChB

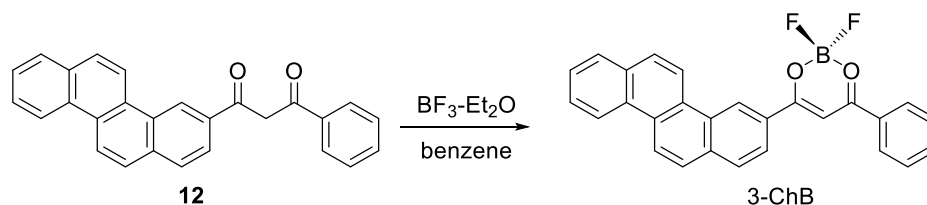

Compound **12** (130 mg, 0.35 mmol) and a  $\text{Et}_2\text{O}$  solution of boron trifluoride diethyl etherate (46 %, 0.3 ml, 1.1 mmol) were added to 5 ml of benzene, and the solution was refluxed for 1 h. The product was purified by silica-gel chromatography using hexane/ethyl acetate (3:1, v/v) to give 3-ChB (70 mg, 47 %). mp 252–253 °C.  $^1\text{H}$  NMR (600 MHz,  $\text{DMSO}-d_6$ )  $\delta_{\text{H}} = 9.90$  (s, 1H), 9.24 (d, 1H,  $J = 8.8$  Hz), 9.17 (d, 1H,  $J = 8.8$  Hz), 9.01 (d, 1H,  $J = 8.4$  Hz), 8.51 (3H, two doublets overlapped), 8.36 (d, 1H,  $J = 8.4$  Hz), 8.33 (s, 1H), 8.31–8.25 (2H, two doublets overlapped), 8.18 (d, 1H,  $J = 7.1$  Hz), 7.88 (t, 1H,  $J = 7.1$  Hz), 7.81 (t, 1H,  $J = 7.1$  Hz), 7.78–7.73 (m, 3H);  $^{13}\text{C}$  NMR (150 MHz,  $\text{DMSO}-d_6$ )  $\delta_{\text{C}} = 182.6, 182.4, 135.9, 132.1, 131.5, 129.8, 129.6, 129.51, 129.46, 129.43, 128.61, 128.57, 128.54, 128.4, 127.4, 127.3, 127.0, 126.8, 126.0, 125.0, 123.6, 121.7, 95.1$ ; HRMS (FAB-TOF)  $m/z$  calcd. for  $\text{C}_{27}\text{H}_{17}\text{BF}_2\text{O}_2$  422.1290 [ $\text{M}^+$ ], found 422.1322.

## 1.3.1 Synthesis of 1-PyDK

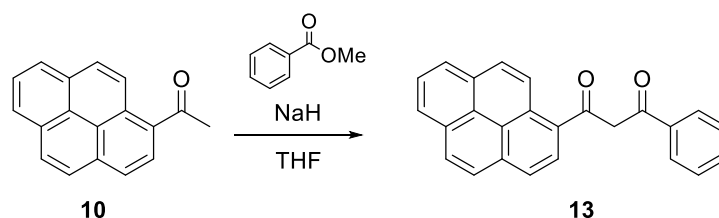

To 15 ml of dry THF, 1-acetylpyrene **10** (735 mg, 3 mmol) and NaH 700 mg (60 % in oil, 1.0 g, 25 mmol) were added, and the mixture was stirred for 15 min at room temperature. Methyl benzoate 0.40 ml (3.3 mmol) was added to the mixture, which was then refluxed for 24 h. After cooling to room temperature, aqueous  $\text{NH}_4\text{Cl}$  (20 %, 30 ml) was added. The product was extracted with ethyl acetate, and the solution was washed with aqueous  $\text{NH}_4\text{Cl}$  and brine. After removal of the solvent, the product was purified by silica-gel chromatography using hexane/ethyl acetate (9:1, v/v) to give compound **13** (990 mg, 95 %). mp 230–234 °C.  $^1\text{H}$  NMR (600 MHz,  $\text{CDCl}_3$ )  $\delta_{\text{H}} = 17.01$  (s, 1H), 8.85 (d, 1H,  $J = 9.4$ ), 8.31 (d,  $J = 8.1$ ), 8.31–8.22 (2H, two doublets overlapped), 8.23 (d, 1H,  $J = 8.1$  Hz), 8.19 (d, 1H,  $J = 8.9$  Hz), 8.11 (d, 1H,  $J = 8.9$  Hz), 8.07 (t, 1H,  $J = 7.5$  Hz), 8.05–8.01 (m, 3H), 7.58 (m, 2H), 7.51 (m, 2H), 6.89 (s, 1H);  $^{13}\text{C}$  NMR (150 MHz,  $\text{CDCl}_3$ )  $\delta_{\text{C}} = 190.8, 184.2, 135.2, 133.4, 132.5, 131.6, 131.2, 130.6, 129.2, 129.1, 129.0, 128.7, 127.2$  (two signals overlapped), 126.4, 126.15, 126.13, 126.0, 124.9, 124.7, 124.5, 124.4, 98.8; HRMS (FAB-TOF)  $m/z$  calcd. for  $\text{C}_{25}\text{H}_{16}\text{O}_2$  348.1150 [ $\text{M}^+$ ], found 348.1174.

### 1.3.2 Synthesis of 1-PyB

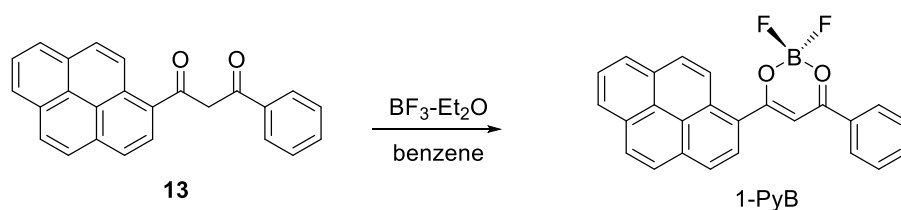

Compound **13** (420 mg, 1.0 mmol) and boron trifluoride diethyl etherate (46 %, 0.55 ml, 2.0 mmol) were added to 10 ml benzene, and the solution was refluxed for 1 h. The precipitated product was filtrated and washed with benzene to give 1-PyB (50 mg, 13 %). mp 131–133 °C.  $^1\text{H}$  NMR (600 MHz,  $\text{DMSO-}d_6$ )  $\delta_{\text{H}}$  = 8.92 (d, 1H,  $J$  = 9.4 Hz), 8.80 (d, 1H,  $J$  = 8.1 Hz), 8.53–8.48 (m, 4H), 8.47 (d, 1H,  $J$  = 8.9 Hz), 8.43 (d, 2H,  $J$  = 7.6 Hz), 8.35 (d, 1H,  $J$  = 8.9 Hz), 8.23 (t, 1H,  $J$  = 7.5 Hz), 7.98 (s, 1H), 7.86 (t, 1H,  $J$  = 7.5 Hz), 7.70 (t, 2H,  $J$  = 7.5 Hz);  $^{13}\text{C}$  NMR (150 MHz,  $\text{DMSO-}d_6$ )  $\delta_{\text{C}}$  = 186.6, 181.9, 135.9, 135.3, 131.4, 131.1, 130.6, 130.1, 129.9, 129.51, 129.46, 129.29, 127.7, 127.31, 127.28, 127.25, 126.0, 124.9, 124.0, 123.8, 123.2, 99.3; HRMS (FAB-TOF)  $m/z$  calcd. for  $\text{C}_{25}\text{H}_{15}\text{BF}_2\text{O}_2$  396.1133 [ $\text{M}^+$ ], found 396.1139.

## 2. Absorption and fluorescence spectra in MeCN

Figure S1 shows absorption and fluorescence spectra of the used compounds in acetonitrile (MeCN).

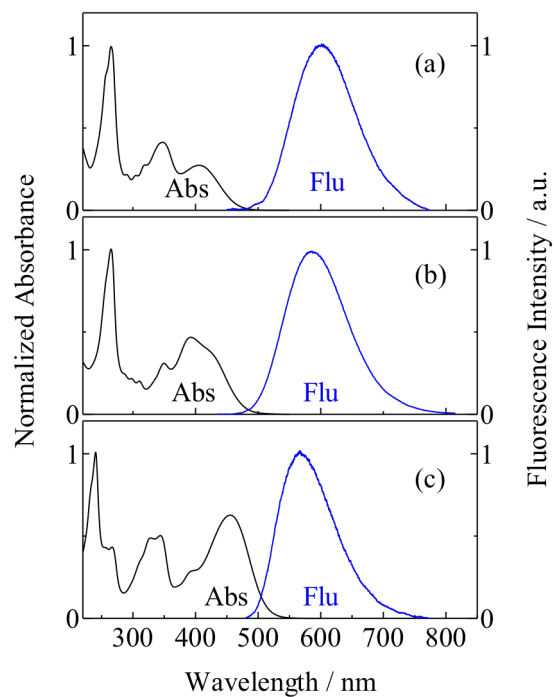

**Figure S1.** Absorption (black) and fluorescence (blue) spectra in MeCN for 1-ChB (a), 3-ChB (b) and 1-PyB (c). The fluorescence spectra are not corrected.



### 3. Absorption and fluorescence spectra in DMSO

Figure S2 shows absorption and fluorescence spectra of 1-PyB in DMSO. The shapes and maximum wavelengths of the fluorescence were similar to each other. A 1 mm path length cuvette was used on the spectroscopic measurements for a highly concentrated DMSO solution of 1-PyB.

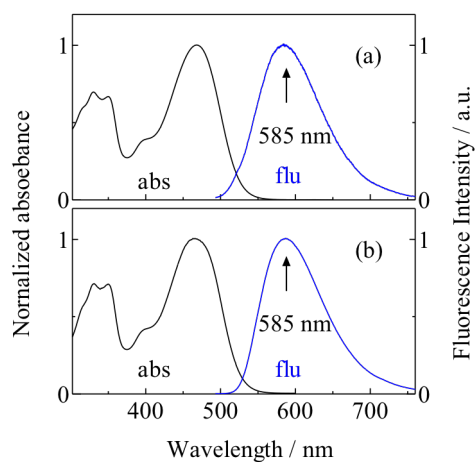

**Figure S2.** Absorption (black) and fluorescence (blue) spectra in DMSO solution of 1-PyB at concentrations of  $3.0 \times 10^{-6} \text{ dm}^3 \text{ mol}^{-1} \text{ cm}^{-1}$  (a) and  $1.0 \times 10^{-3} \text{ dm}^3 \text{ mol}^{-1} \text{ cm}^{-1}$  (b). The fluorescence spectra are not corrected.

#### 4. Decay profiles of fluorescence

Figure S3 shows decay profiles of fluorescence of 1-ChB, 3-ChB and 1-PyB in  $\text{CHCl}_3$  and MeCN. The decay profiles except for 1-PyB in MeCN were analyzed by fitting a single-exponential function whereas that for 1-PyB in MeCN was analyzed with a double-exponential function (Figure S3f).

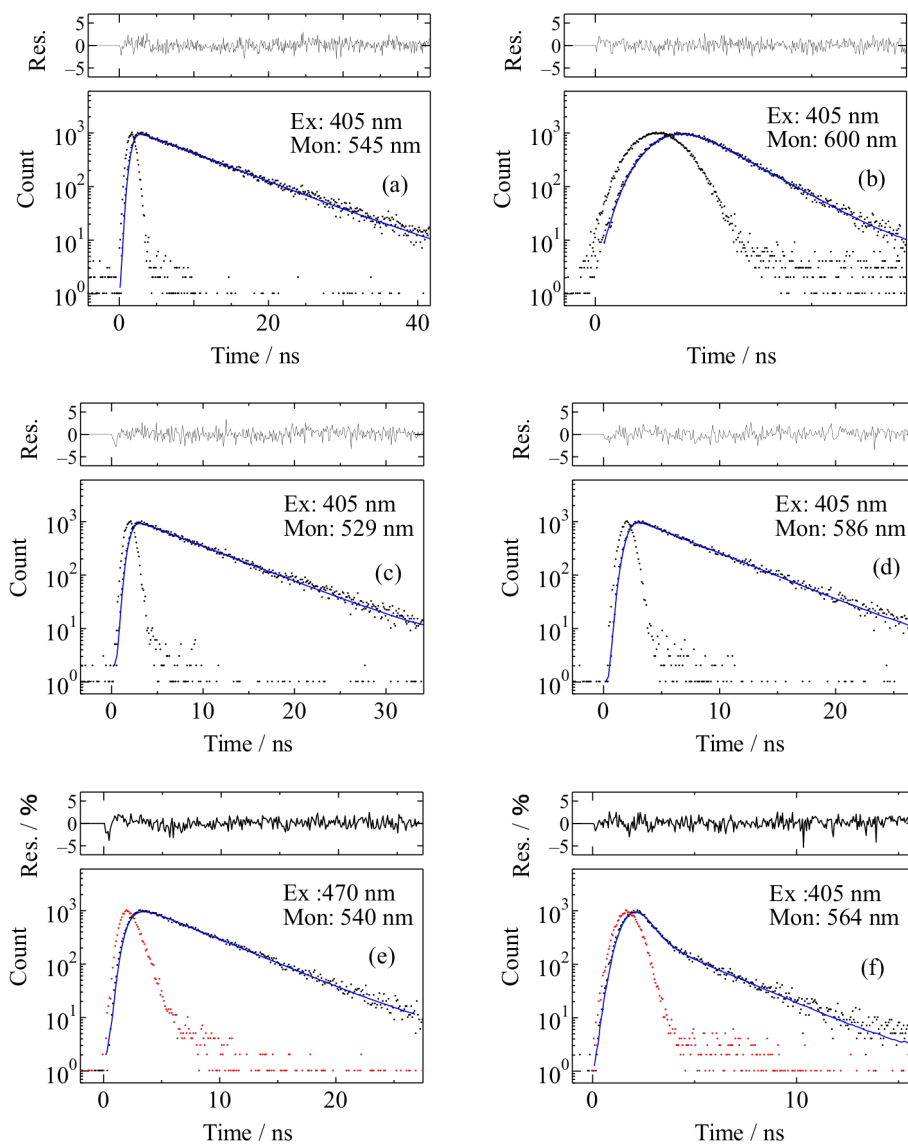

**Figure S3.** Decay profiles of fluorescence for 1-ChB in  $\text{CHCl}_3$  (a) and MeCN (b), 3-ChB in  $\text{CHCl}_3$  (c) and MeCN (d), and 1-PyB in  $\text{CHCl}_3$  (e) and MeCN (f) at 295 K. Ex. and Mon. in the figures indicate the excitation and monitoring wavelengths, respectively.

## 5. Lippert-Mataga analysis data

Spectroscopic data of absorption and fluorescence for the BF<sub>2</sub>DKs in various solvents and the solvent properties are listed in Tables S1-3 for performing the Lippert-Mataga analysis.

**Table S1.** Spectroscopic data and solvent properties on performing Lippert-Mataga plot for 1-ChB.

| Solvent          | F ( $\epsilon_r$ , n) | $\lambda_{\text{abs}}^0$ <sup>a</sup> / nm | $\lambda_{\text{em}}^0$ <sup>b</sup> / nm | $\Delta\bar{\nu}$ <sup>c</sup> /cm <sup>-1</sup> |
|------------------|-----------------------|--------------------------------------------|-------------------------------------------|--------------------------------------------------|
| Benzene          | 0.006                 | 415                                        | 519                                       | 4830                                             |
| CCl <sub>4</sub> | 0.022                 | 409                                        | 486                                       | 3870                                             |
| Toluene          | 0.268                 | 415                                        | 521                                       | 4900                                             |
| Chloroform       | 0.296                 | 416                                        | 544                                       | 5660                                             |
| Diethyl ether    | 0.329                 | 403                                        | 517                                       | 5470                                             |
| THF              | 0.419                 | 408                                        | 544                                       | 6130                                             |
| Dichloromethane  | 0.444                 | 414                                        | 567                                       | 6520                                             |
| Ethanol          | 0.578                 | 408                                        | 577                                       | 7180                                             |
| Acetonitrile     | 0.609                 | 406                                        | 602                                       | 8020                                             |

a) The maximum wavelength of the first absorption band. b) The maximum wavelength of the first fluorescence band. c) The energy difference between the energies estimated from  $\lambda_{\text{abs}}^0$  and  $\lambda_{\text{em}}^0$  in cm<sup>-1</sup> unit.

**Table S2.** Spectroscopic data and solvent properties on performing Lippert-Mataga plot for 3-ChB.

| Solvent          | F ( $\epsilon_r$ , n) | $\lambda_{\text{abs}}^0$ <sup>a</sup> / nm | $\lambda_{\text{em}}^0$ <sup>b</sup> / nm | $\Delta\bar{\nu}$ <sup>c</sup> /cm <sup>-1</sup> |
|------------------|-----------------------|--------------------------------------------|-------------------------------------------|--------------------------------------------------|
| Benzene          | 0.006                 | 431                                        | 500                                       | 3200                                             |
| CCl <sub>4</sub> | 0.022                 | 433                                        | 460                                       | 1360                                             |
| Toluene          | 0.268                 | 431                                        | 498                                       | 3120                                             |
| Chloroform       | 0.296                 | 430                                        | 529                                       | 4350                                             |
| Diethyl ether    | 0.329                 | 421                                        | 500                                       | 3750                                             |
| THF              | 0.419                 | 428                                        | 528                                       | 4430                                             |
| Dichloromethane  | 0.444                 | 431                                        | 557                                       | 5250                                             |
| Ethanol          | 0.578                 | 431                                        | 559                                       | 5310                                             |
| Acetonitrile     | 0.609                 | 426                                        | 586                                       | 6410                                             |

a) The maximum wavelength of the first absorption band. b) The maximum wavelength of the first fluorescence band. c) The energy difference between the energies estimated from  $\lambda_{\text{abs}}^0$  and  $\lambda_{\text{em}}^0$  in cm<sup>-1</sup> unit.

**Table S3.** Spectroscopic data and solvent properties on performing Lippert-Mataga plot for 1-PyB.

| Solvent          | F ( $\epsilon_r$ , n) | $\lambda_{\text{abs}}^0$ <sup>a</sup> / nm | $\lambda_{\text{em}}^0$ <sup>b</sup> / nm | $\Delta\bar{\nu}$ <sup>c</sup> /cm <sup>-1</sup> |
|------------------|-----------------------|--------------------------------------------|-------------------------------------------|--------------------------------------------------|
| Benzene          | 0.006                 | 463                                        | 522                                       | 2440                                             |
| CCl <sub>4</sub> | 0.022                 | 461                                        | 496                                       | 1530                                             |
| Toluene          | 0.268                 | 462                                        | 520                                       | 2410                                             |
| Chloroform       | 0.296                 | 465                                        | 542                                       | 3060                                             |
| Diethyl ether    | 0.329                 | 450                                        | 515                                       | 2800                                             |
| THF              | 0.419                 | 455                                        | 537                                       | 3360                                             |
| Dichloromethane  | 0.444                 | 464                                        | 558                                       | 3630                                             |
| Ethanol          | 0.578                 | 456                                        | 550                                       | 3750                                             |
| Acetonitrile     | 0.609                 | 455                                        | 567                                       | 4340                                             |

a) The maximum wavelength of the first absorption band. b) The maximum wavelength of the first fluorescence band. c) The energy difference between the energies estimated from  $\lambda_{\text{abs}}^0$  and  $\lambda_{\text{em}}^0$  in cm<sup>-1</sup> unit.

## 6. Transient absorption spectra in MeCN

Figure S4 shows transient absorption spectra obtained upon 266 nm laser pulsing in the MeCN solution of the BF<sub>2</sub>DKs.

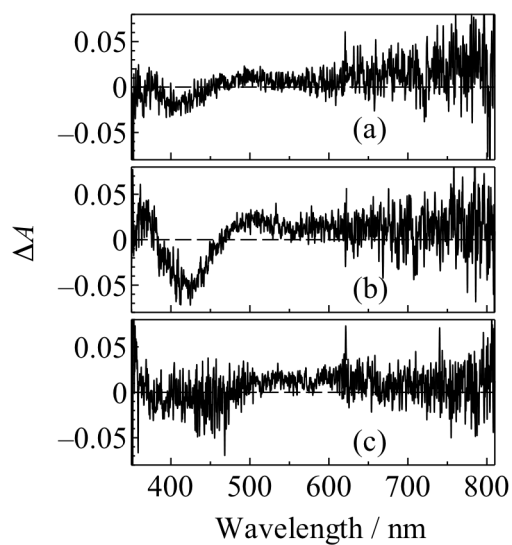

**Figure S4** Transient absorption spectra obtained at 200 ns upon 266 nm laser pulsing in the Ar-purged MeCN solution of 1-ChB (a), 3-ChB (b) and 1-PyB (c) at 295 K.

## 7. Results of DFT and TD-DFT calculations (absorption spectra, atom coordinates and sum of electronic and zero-point energies)

The calculation was carried out at the DFT level, using the Gaussian 09 software package.<sup>3</sup> The geometries of the difluoroboronated  $\beta$ -diketones were fully optimized by using the 6-31G(d) base set at the B3LYP method considering dielectric constants of  $\text{CHCl}_3$  and MeCN on the CPCM model. Figure S5 compares experimental absorption spectra in  $\text{CHCl}_3$  with the calculated ones considering the dielectric constant of  $\text{CHCl}_3$  on the CPCM model. Atom coordinates for the optimized geometries of the difluoroboronated  $\beta$ -diketones in  $\text{CHCl}_3$  and MeCN are listed in Tables S4-9.

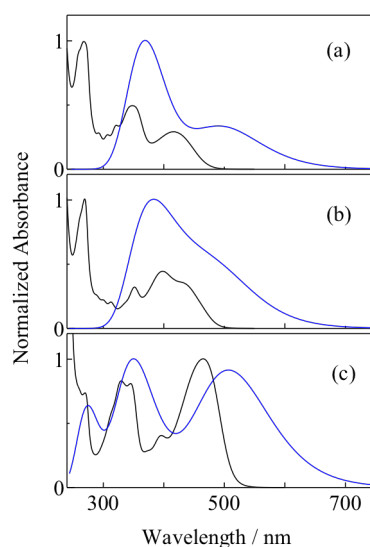

**Figure S5.** Absorption spectra of 1-ChB (a), 3-ChB (b) and 1-PyB (c) in  $\text{CHCl}_3$  (black) and calculated ones by considering the  $\text{CHCl}_3$  dielectric constant (blue).

**Table S4.** Atom coordinates for the optimized geometry of 1-ChB in CHCl<sub>3</sub>.

|   | X        | Y        | Z        |
|---|----------|----------|----------|
| C | 5.00313  | -0.62715 | -0.40465 |
| C | 6.06819  | 0.31603  | -0.27654 |
| C | 5.75932  | 1.66956  | 0.06118  |
| C | 4.47047  | 2.07804  | 0.25964  |
| C | 3.36758  | 1.16977  | 0.14062  |
| C | 3.6347   | -0.18205 | -0.19165 |
| C | 1.99436  | 1.60762  | 0.34883  |
| C | 0.92133  | 0.66245  | 0.2566   |
| C | 1.23856  | -0.68475 | -0.10014 |
| C | 2.53002  | -1.07888 | -0.31703 |
| C | 1.67948  | 2.96186  | 0.63058  |
| C | 0.37423  | 3.38423  | 0.79944  |
| C | -0.68074 | 2.46418  | 0.70818  |
| C | -0.42814 | 1.1169   | 0.46025  |
| C | -1.58801 | 0.20479  | 0.45412  |
| C | -2.81663 | 0.56738  | -0.10373 |
| C | -3.92473 | -0.27449 | 0.04474  |
| C | -5.28094 | 0.05927  | -0.41464 |
| C | -5.61368 | 1.35649  | -0.854   |
| C | -6.90729 | 1.64208  | -1.28521 |
| C | -7.88558 | 0.64099  | -1.28602 |
| C | -7.56596 | -0.64967 | -0.84927 |
| C | -6.27491 | -0.94007 | -0.41393 |
| O | -1.43326 | -0.95618 | 1.04024  |
| O | -3.79622 | -1.43841 | 0.6321   |
| B | -2.47347 | -2.02124 | 0.97978  |
| F | -2.56461 | -2.6236  | 2.22728  |
| F | -2.11271 | -2.94621 | -0.00397 |
| H | 6.57551  | 2.38096  | 0.16184  |
| H | 4.29689  | 3.11539  | 0.51799  |
| H | 0.4454   | -1.41256 | -0.20728 |
| H | 2.70405  | -2.11199 | -0.59392 |
| H | 2.46806  | 3.69991  | 0.71133  |
| H | 0.16305  | 4.4275   | 1.01372  |
| H | -1.69821 | 2.80228  | 0.87565  |
| H | -2.9028  | 1.50327  | -0.63378 |
| H | -4.87548 | 2.15089  | -0.84735 |
| H | -7.15348 | 2.64658  | -1.61671 |
| H | -8.89314 | 0.86679  | -1.62421 |
| H | -8.32254 | -1.42901 | -0.8499  |
| H | -6.02455 | -1.94025 | -0.07856 |
| C | 7.40917  | -0.09832 | -0.48218 |
| C | 5.34157  | -1.96579 | -0.73654 |
| C | 7.70453  | -1.40829 | -0.80656 |
| H | 8.73468  | -1.71683 | -0.96276 |
| C | 6.65758  | -2.34743 | -0.93318 |
| H | 6.88468  | -3.37958 | -1.18644 |
| H | 4.56741  | -2.71749 | -0.84122 |
| H | 8.20392  | 0.63701  | -0.37948 |

Sum of electronic and zero-point energies = -1414.310434 Hartree

**Table S5.** Atom coordinates for the optimized geometry of 1-ChB in MeCN.

|   | X        | Y        | Z        |
|---|----------|----------|----------|
| C | 4.98434  | -0.63406 | -0.40591 |
| C | 6.05181  | 0.31033  | -0.32219 |
| C | 5.74969  | 1.6705   | -0.01001 |
| C | 4.46607  | 2.08271  | 0.20783  |
| C | 3.3611   | 1.17344  | 0.13422  |
| C | 3.62104  | -0.18456 | -0.17487 |
| C | 1.99337  | 1.61468  | 0.36399  |
| C | 0.91835  | 0.66913  | 0.30361  |
| C | 1.22673  | -0.68644 | -0.02784 |
| C | 2.51411  | -1.0832  | -0.25719 |
| C | 1.68332  | 2.97014  | 0.64094  |
| C | 0.38275  | 3.39429  | 0.83487  |
| C | -0.67389 | 2.47392  | 0.76581  |
| C | -0.42607 | 1.12717  | 0.52013  |
| C | -1.58693 | 0.20948  | 0.51314  |
| C | -2.8023  | 0.56396  | -0.08628 |
| C | -3.91353 | -0.27635 | 0.05987  |
| C | -5.26727 | 0.05866  | -0.42513 |
| C | -5.59665 | 1.34711  | -0.88572 |
| C | -6.88367 | 1.62584  | -1.34067 |
| C | -7.85965 | 0.62364  | -1.34284 |
| C | -7.54322 | -0.65872 | -0.88377 |
| C | -6.25792 | -0.94104 | -0.42571 |
| O | -1.44559 | -0.92852 | 1.1234   |
| O | -3.8022  | -1.42303 | 0.66231  |
| B | -2.46444 | -2.03633 | 0.99224  |
| F | -2.5624  | -2.69365 | 2.18685  |
| F | -2.08018 | -2.84127 | -0.06712 |
| H | 6.56813  | 2.38392  | 0.05529  |
| H | 4.29681  | 3.12618  | 0.44544  |
| H | 0.43216  | -1.41767 | -0.09494 |
| H | 2.68411  | -2.12358 | -0.50831 |
| H | 2.47525  | 3.70696  | 0.70176  |
| H | 0.17726  | 4.43895  | 1.0508   |
| H | -1.69009 | 2.80937  | 0.95007  |
| H | -2.87151 | 1.48733  | -0.64113 |
| H | -4.85751 | 2.14151  | -0.87737 |
| H | -7.12697 | 2.62565  | -1.68955 |
| H | -8.86278 | 0.84302  | -1.69905 |
| H | -8.29825 | -1.44002 | -0.88394 |
| H | -6.00414 | -1.93332 | -0.06969 |
| C | 7.38694  | -0.10995 | -0.54558 |
| C | 5.31672  | -1.97927 | -0.7125  |
| C | 7.67595  | -1.42643 | -0.84396 |
| H | 8.70292  | -1.73913 | -1.01318 |
| C | 6.62717  | -2.36681 | -0.92657 |
| H | 6.84865  | -3.40526 | -1.15868 |
| H | 4.53964  | -2.73202 | -0.78167 |
| H | 8.18393  | 0.62729  | -0.47647 |

Sum of electronic and zero-point energies = -1414.31541927 Hartree



**Table S6.** Atom coordinates for the optimized geometry of 3-ChB in CHCl<sub>3</sub>.

|   | X        | Y        | Z        |
|---|----------|----------|----------|
| C | 5.65270  | 0.18931  | 0.04086  |
| C | 5.69000  | -1.23907 | 0.06872  |
| C | 4.46134  | -1.96768 | 0.05636  |
| C | 3.25440  | -1.32713 | 0.01929  |
| C | 3.16648  | 0.10133  | -0.00859 |
| C | 4.36397  | 0.86286  | 0.00179  |
| C | 1.88112  | 0.78433  | -0.04796 |
| C | 1.84349  | 2.21340  | -0.07450 |
| C | 3.06803  | 2.94135  | -0.06349 |
| C | 4.27172  | 2.29171  | -0.02662 |
| C | 0.65004  | 0.09355  | -0.06008 |
| C | -0.57469 | 0.76209  | -0.09097 |
| C | -0.59290 | 2.18401  | -0.12022 |
| C | 0.59161  | 2.88242  | -0.11367 |
| C | -1.81349 | -0.02548 | -0.08897 |
| C | -3.08581 | 0.52377  | 0.10396  |
| C | -4.21969 | -0.28387 | -0.02346 |
| C | -5.60072 | 0.21958  | 0.04057  |
| C | -6.66407 | -0.7001  | 0.13887  |
| C | -7.98101 | -0.25064 | 0.20649  |
| C | -8.25707 | 1.12089  | 0.17144  |
| C | -7.20870 | 2.04247  | 0.06740  |
| C | -5.88955 | 1.59859  | 0.00295  |
| O | -1.67240 | -1.31316 | -0.29782 |
| O | -4.09832 | -1.57317 | -0.22772 |
| B | -2.79146 | -2.27291 | -0.11650 |
| F | -2.71677 | -3.23886 | -1.11240 |
| F | -2.69406 | -2.85117 | 1.15375  |
| H | 4.49930  | -3.05416 | 0.07684  |
| H | 2.35175  | -1.92650 | 0.01095  |
| H | 3.03383  | 4.02751  | -0.08391 |
| H | 5.17630  | 2.88818  | -0.01859 |
| H | 0.62852  | -0.98746 | -0.03666 |
| H | -1.52923 | 2.72829  | -0.16817 |
| H | 0.58144  | 3.96875  | -0.14357 |
| H | -3.19375 | 1.57412  | 0.32136  |
| H | -6.44814 | -1.76212 | 0.16956  |
| H | -8.79187 | -0.96874 | 0.28825  |
| H | -9.28448 | 1.47066  | 0.22267  |
| H | -7.41935 | 3.10732  | 0.03177  |
| H | -5.09413 | 2.32942  | -0.09471 |
| C | 6.89214  | 0.88266  | 0.05329  |
| C | 6.93717  | -1.91408 | 0.10759  |
| C | 8.12493  | -1.20913 | 0.11897  |
| H | 9.07561  | -1.73449 | 0.14903  |
| C | 8.09695  | 0.20249  | 0.09132  |
| H | 9.02848  | 0.76211  | 0.10008  |
| H | 6.91500  | 1.96627  | 0.03310  |
| H | 6.94083  | -3.00139 | 0.12832  |

Sum of electronic and zero-point energies = 1414.31773972 Hartree

**Table S7.** Atom coordinates for the optimized geometry of 3-ChB in MeCN.

|   | X        | Y        | Z        |
|---|----------|----------|----------|
| C | 5.65150  | 0.18618  | 0.03113  |
| C | 5.68560  | -1.24176 | 0.03316  |
| C | 4.45553  | -1.96620 | 0.01105  |
| C | 3.25040  | -1.32369 | -0.01124 |
| C | 3.16555  | 0.10474  | -0.01361 |
| C | 4.36480  | 0.86262  | 0.00689  |
| C | 1.88188  | 0.78963  | -0.03726 |
| C | 1.84587  | 2.21806  | -0.03944 |
| C | 3.07188  | 2.94283  | -0.01970 |
| C | 4.27386  | 2.29110  | 0.00292  |
| C | 0.64945  | 0.10050  | -0.05681 |
| C | -0.57369 | 0.76809  | -0.07373 |
| C | -0.58992 | 2.18865  | -0.07974 |
| C | 0.59460  | 2.88716  | -0.06404 |
| C | -1.81259 | -0.02911 | -0.07969 |
| C | -3.08820 | 0.51844  | 0.11494  |
| C | -4.21687 | -0.29505 | -0.03819 |
| C | -5.60337 | 0.21251  | 0.00972  |
| C | -6.66040 | -0.70710 | 0.14067  |
| C | -7.97918 | -0.26071 | 0.19966  |
| C | -8.26251 | 1.10636  | 0.12164  |
| C | -7.21927 | 2.02780  | -0.01787 |
| C | -5.89898 | 1.58576  | -0.07270 |
| O | -1.66539 | -1.30322 | -0.29990 |
| O | -4.09667 | -1.57199 | -0.25130 |
| B | -2.78190 | -2.29079 | -0.07228 |
| F | -2.69000 | -3.28378 | -1.01020 |
| F | -2.70695 | -2.73996 | 1.23356  |
| H | 4.49094  | -3.05313 | 0.01231  |
| H | 2.34571  | -1.91990 | -0.02786 |
| H | 3.03944  | 4.02973  | -0.02224 |
| H | 5.18043  | 2.88494  | 0.01811  |
| H | 0.62076  | -0.98072 | -0.05321 |
| H | -1.52782 | 2.73235  | -0.11559 |
| H | 0.58555  | 3.97446  | -0.07539 |
| H | -3.20196 | 1.56515  | 0.34876  |
| H | -6.43208 | -1.76547 | 0.20121  |
| H | -8.78648 | -0.97986 | 0.30753  |
| H | -9.29162 | 1.45324  | 0.16564  |
| H | -7.43525 | 3.09025  | -0.08988 |
| H | -5.10402 | 2.31316  | -0.20223 |
| C | 6.89262  | 0.87443  | 0.05336  |
| C | 6.93073  | -1.91915 | 0.05679  |
| C | 8.11995  | -1.21885 | 0.07809  |
| H | 9.06918  | -1.74758 | 0.09617  |
| C | 8.09546  | 0.19204  | 0.07628  |
| H | 9.02850  | 0.74929  | 0.09303  |
| H | 6.91742  | 1.95844  | 0.05287  |
| H | 6.93148  | -3.00686 | 0.05785  |

Sum of electronic and zero-point energies = -1414.32360393 Hartree

**Table S8.** Atom coordinates for the optimized geometry of 1-PyB in CHCl<sub>3</sub>.

|   | X        | Y        | Z        |
|---|----------|----------|----------|
| C | -5.37434 | 1.88296  | -0.86440 |
| C | -6.55107 | 1.13843  | -0.78925 |
| C | -6.51072 | -0.20702 | -0.42190 |
| C | -5.28971 | -0.83514 | -0.12092 |
| C | -4.07859 | -0.07824 | -0.18924 |
| C | -4.13121 | 1.29556  | -0.56933 |
| C | -2.82346 | -0.69205 | 0.11733  |
| C | -1.61088 | 0.07363  | 0.06570  |
| C | -1.70078 | 1.45140  | -0.34327 |
| C | -2.90064 | 2.02635  | -0.64426 |
| C | -2.79475 | -2.07652 | 0.47481  |
| C | -1.55859 | -2.68378 | 0.75594  |
| C | -0.38342 | -1.95241 | 0.69266  |
| C | -0.38003 | -0.58228 | 0.36794  |
| C | 0.91810  | 0.11685  | 0.37198  |
| C | 2.09903  | -0.50541 | -0.06184 |
| C | 3.32311  | 0.15506  | 0.08910  |
| C | 4.63001  | -0.45435 | -0.23030 |
| C | 4.77150  | -1.83413 | -0.46810 |
| C | 6.01981  | -2.37328 | -0.77204 |
| C | 7.14397  | -1.54378 | -0.84408 |
| C | 7.01427  | -0.17210 | -0.60558 |
| C | 5.76819  | 0.37046  | -0.29772 |
| O | 0.93831  | 1.33436  | 0.82895  |
| O | 3.37099  | 1.37424  | 0.54216  |
| B | 2.13986  | 2.23319  | 0.66020  |
| F | 2.25711  | 3.02802  | 1.76735  |
| F | 1.98029  | 2.93620  | -0.52345 |
| H | -5.40847 | 2.93070  | -1.15364 |
| H | -7.50394 | 1.60784  | -1.01871 |
| H | -7.43067 | -0.78441 | -0.36533 |
| H | -0.79899 | 2.04479  | -0.40659 |
| H | -2.93422 | 3.06940  | -0.95026 |
| H | -1.53124 | -3.73346 | 1.03757  |
| H | 0.55412  | -2.43704 | 0.94712  |
| H | 2.05332  | -1.48927 | -0.50358 |
| H | 3.91386  | -2.49555 | -0.39942 |
| H | 6.11714  | -3.44109 | -0.94801 |
| H | 8.11659  | -1.96620 | -1.08265 |
| H | 7.88468  | 0.47592  | -0.66065 |
| H | 5.65905  | 1.43334  | -0.11265 |
| C | -5.21971 | -2.21943 | 0.25420  |
| C | -4.02560 | -2.81316 | 0.53733  |
| H | -6.14397 | -2.79042 | 0.30603  |
| H | -3.98451 | -3.86312 | 0.81732  |

Sum of electronic and zero-point energies = -1336.90128577 Hartree

**Table S9.** Atom coordinates for the optimized geometry of 1-PyB in MeCN.

|   | X        | Y        | Z        |
|---|----------|----------|----------|
| C | 5.40437  | -1.87834 | -0.82006 |
| C | 6.57706  | -1.12902 | -0.72344 |
| C | 6.52450  | 0.21870  | -0.36280 |
| C | 5.29498  | 0.84443  | -0.08989 |
| C | 4.08770  | 0.08271  | -0.17867 |
| C | 4.15340  | -1.29250 | -0.55228 |
| C | 2.82461  | 0.69403  | 0.10094  |
| C | 1.61524  | -0.07570 | 0.03168  |
| C | 1.71939  | -1.45279 | -0.37548 |
| C | 2.92678  | -2.02688 | -0.65194 |
| C | 2.78553  | 2.08135  | 0.44857  |
| C | 1.54208  | 2.68811  | 0.70149  |
| C | 0.37066  | 1.95334  | 0.62521  |
| C | 0.37602  | 0.57817  | 0.31292  |
| C | -0.91811 | -0.11932 | 0.31892  |
| C | -2.10734 | 0.50425  | -0.08454 |
| C | -3.32868 | -0.15556 | 0.07504  |
| C | -4.63765 | 0.45179  | -0.21963 |
| C | -4.77933 | 1.83595  | -0.44054 |
| C | -6.03153 | 2.37943  | -0.72005 |
| C | -7.15861 | 1.55216  | -0.78502 |
| C | -7.02879 | 0.17663  | -0.56433 |
| C | -5.77934 | -0.37118 | -0.28043 |
| O | -0.93351 | -1.35232 | 0.75745  |
| O | -3.36647 | -1.38717 | 0.51861  |
| B | -2.14041 | -2.22427 | 0.63908  |
| F | -2.23906 | -3.00014 | 1.78097  |
| F | -2.01302 | -3.00682 | -0.50998 |
| H | 5.44765  | -2.92658 | -1.10528 |
| H | 7.53595  | -1.59570 | -0.93141 |
| H | 7.44089  | 0.79936  | -0.29020 |
| H | 0.82093  | -2.04793 | -0.46244 |
| H | 2.96932  | -3.06928 | -0.95857 |
| H | 1.50597  | 3.73984  | 0.97247  |
| H | -0.56976 | 2.44084  | 0.86007  |
| H | -2.07191 | 1.49572  | -0.50879 |
| H | -3.92147 | 2.49681  | -0.37750 |
| H | -6.12920 | 3.44900  | -0.88235 |
| H | -8.13355 | 1.9788   | -1.00456 |
| H | -7.90094 | -0.46895 | -0.61513 |
| H | -5.67504 | -1.43725 | -0.11235 |
| C | 5.21417  | 2.23118  | 0.27537  |
| C | 4.01205  | 2.82330  | 0.53053  |
| H | 6.13519  | 2.80526  | 0.34175  |
| H | 3.96166  | 3.87470  | 0.80207  |

Sum of electronic and zero-point energies = -1336.90638036 Hartree

## 8. $^1\text{H}$ and $^{13}\text{C}$ NMR spectra

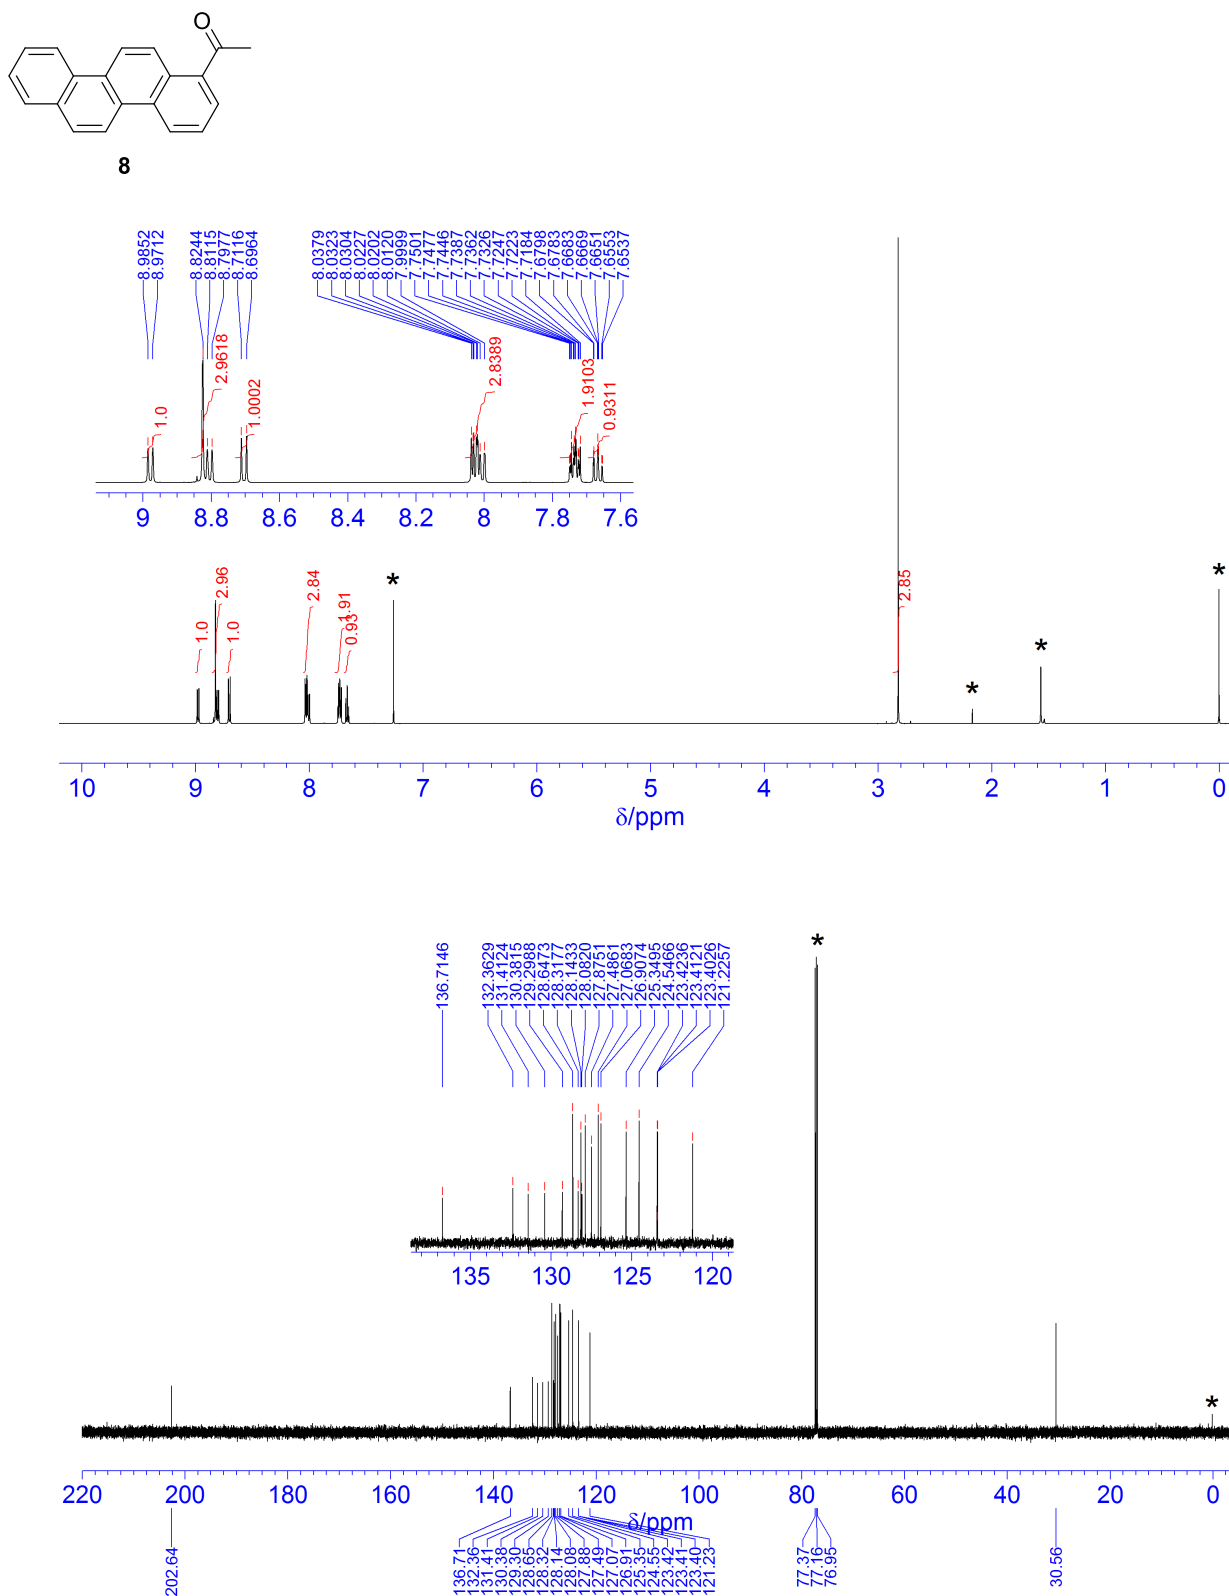

**Figure S6.**  $^1\text{H}$ - (600 MHz) (upper) and  $^{13}\text{C}$  (150 MHz) NMR spectra (lower) of **8** in  $\text{CDCl}_3$ . The asterisked peaks are due to the solvent, TMS,  $\text{H}_2\text{O}$  included in the solvent, and other impurity.

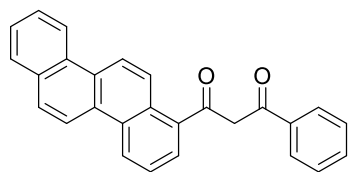

11

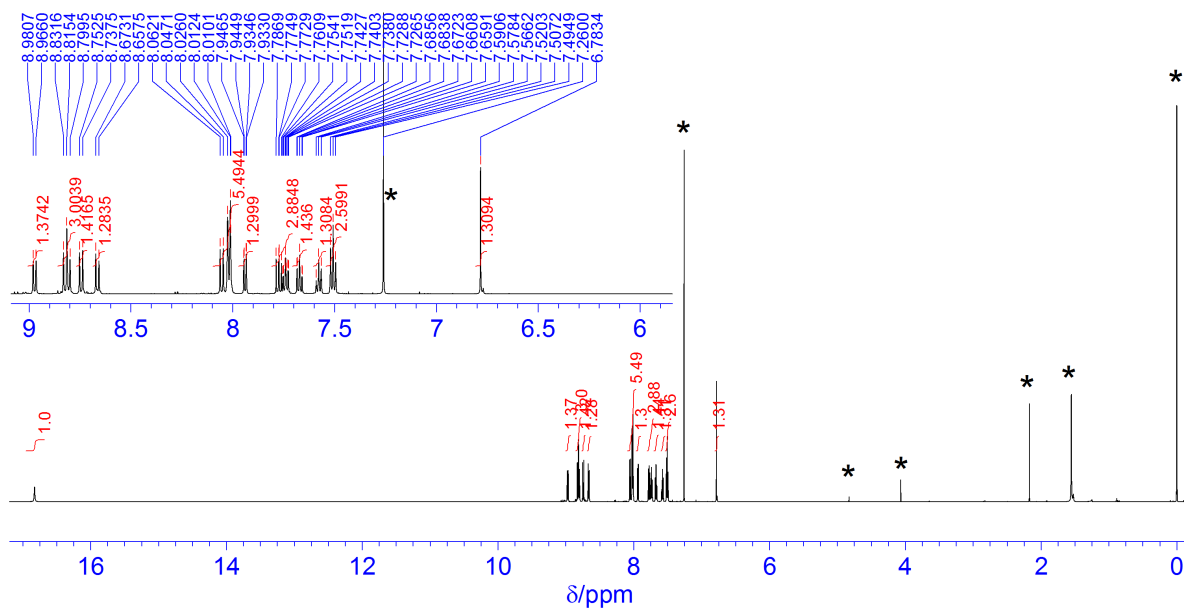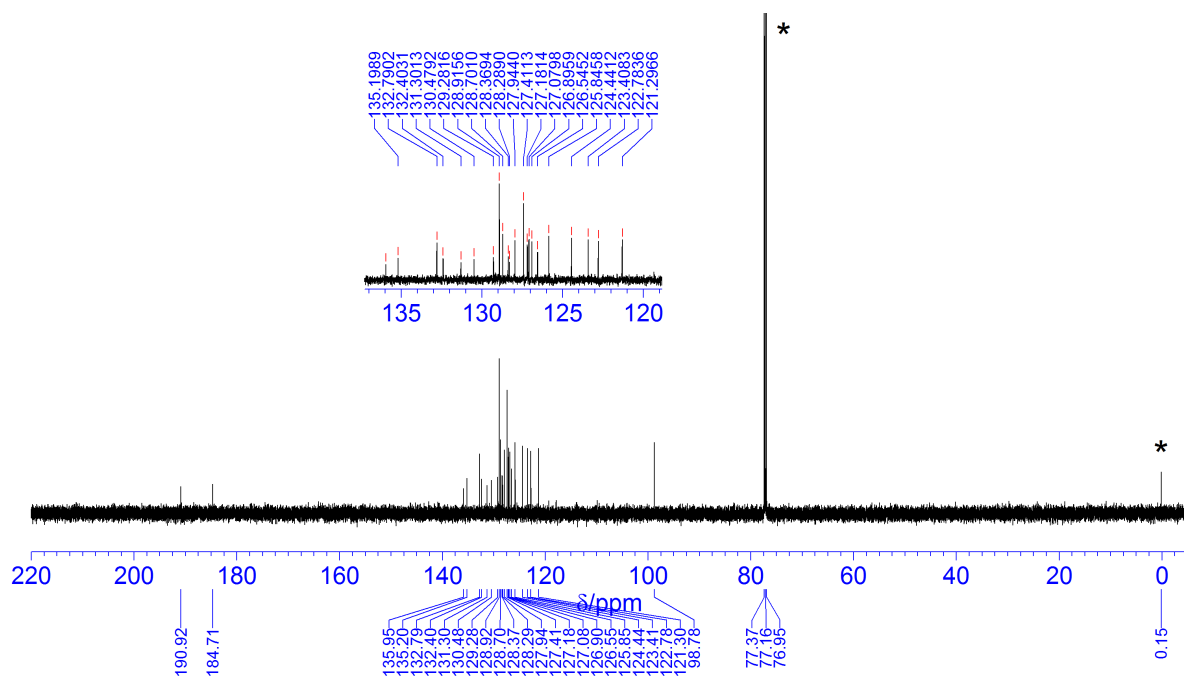

**Figure S7.**  $^1\text{H}$ - (600 MHz) (upper) and  $^{13}\text{C}$  (150 MHz) NMR spectra (lower) of **11** in  $\text{CDCl}_3$ . The asterisked peaks are due to the solvent, TMS,  $\text{H}_2\text{O}$  included in the solvent, and other impurity.

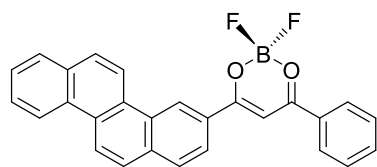

3-ChB

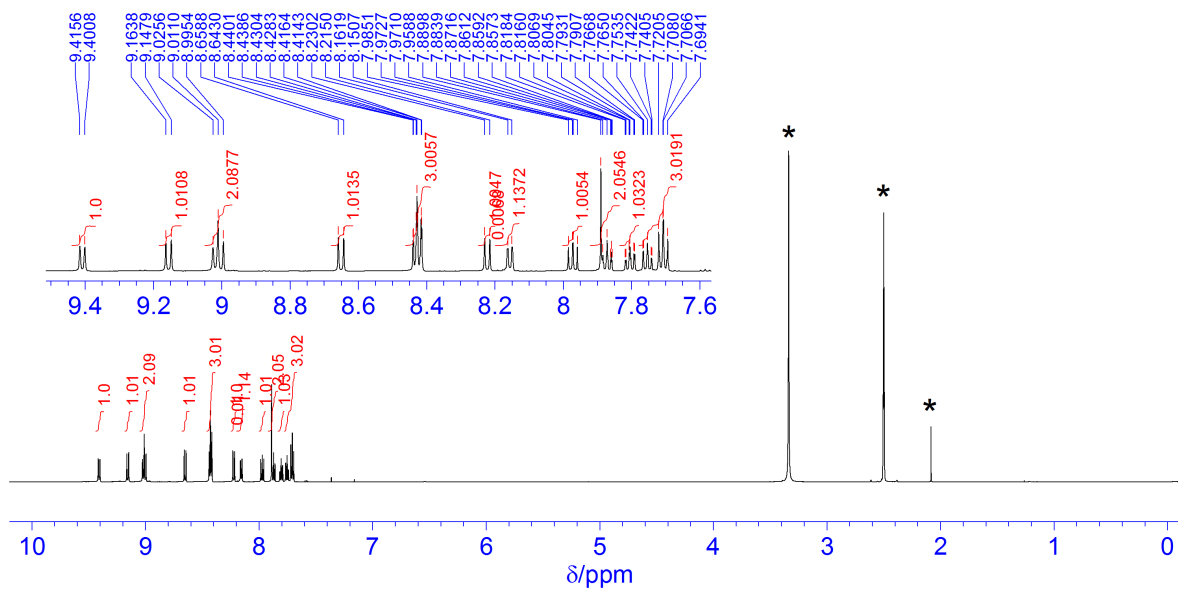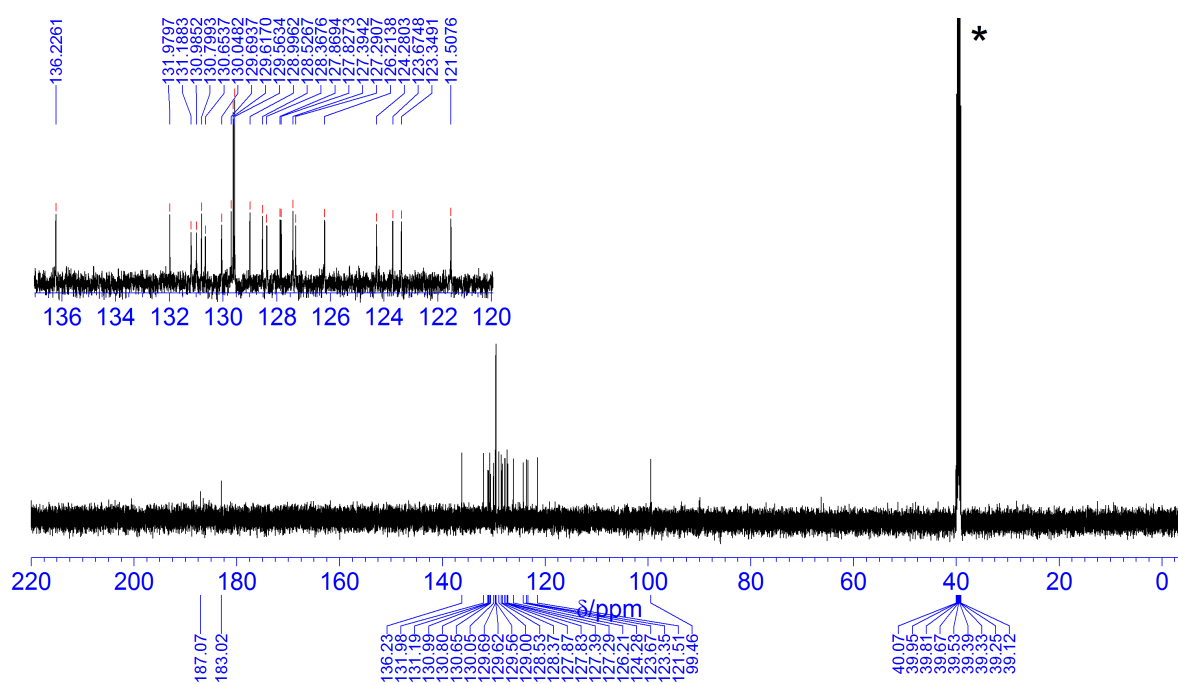

**Figure S8.**  $^1\text{H}$ - (600 MHz) (upper) and  $^{13}\text{C}$  (150 MHz) NMR spectra (lower) of 1-ChB in  $\text{DMSO-}d_6$ . The asterisked peaks are due to the solvent,  $\text{H}_2\text{O}$  included in the solvent, and other impurity.

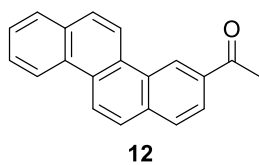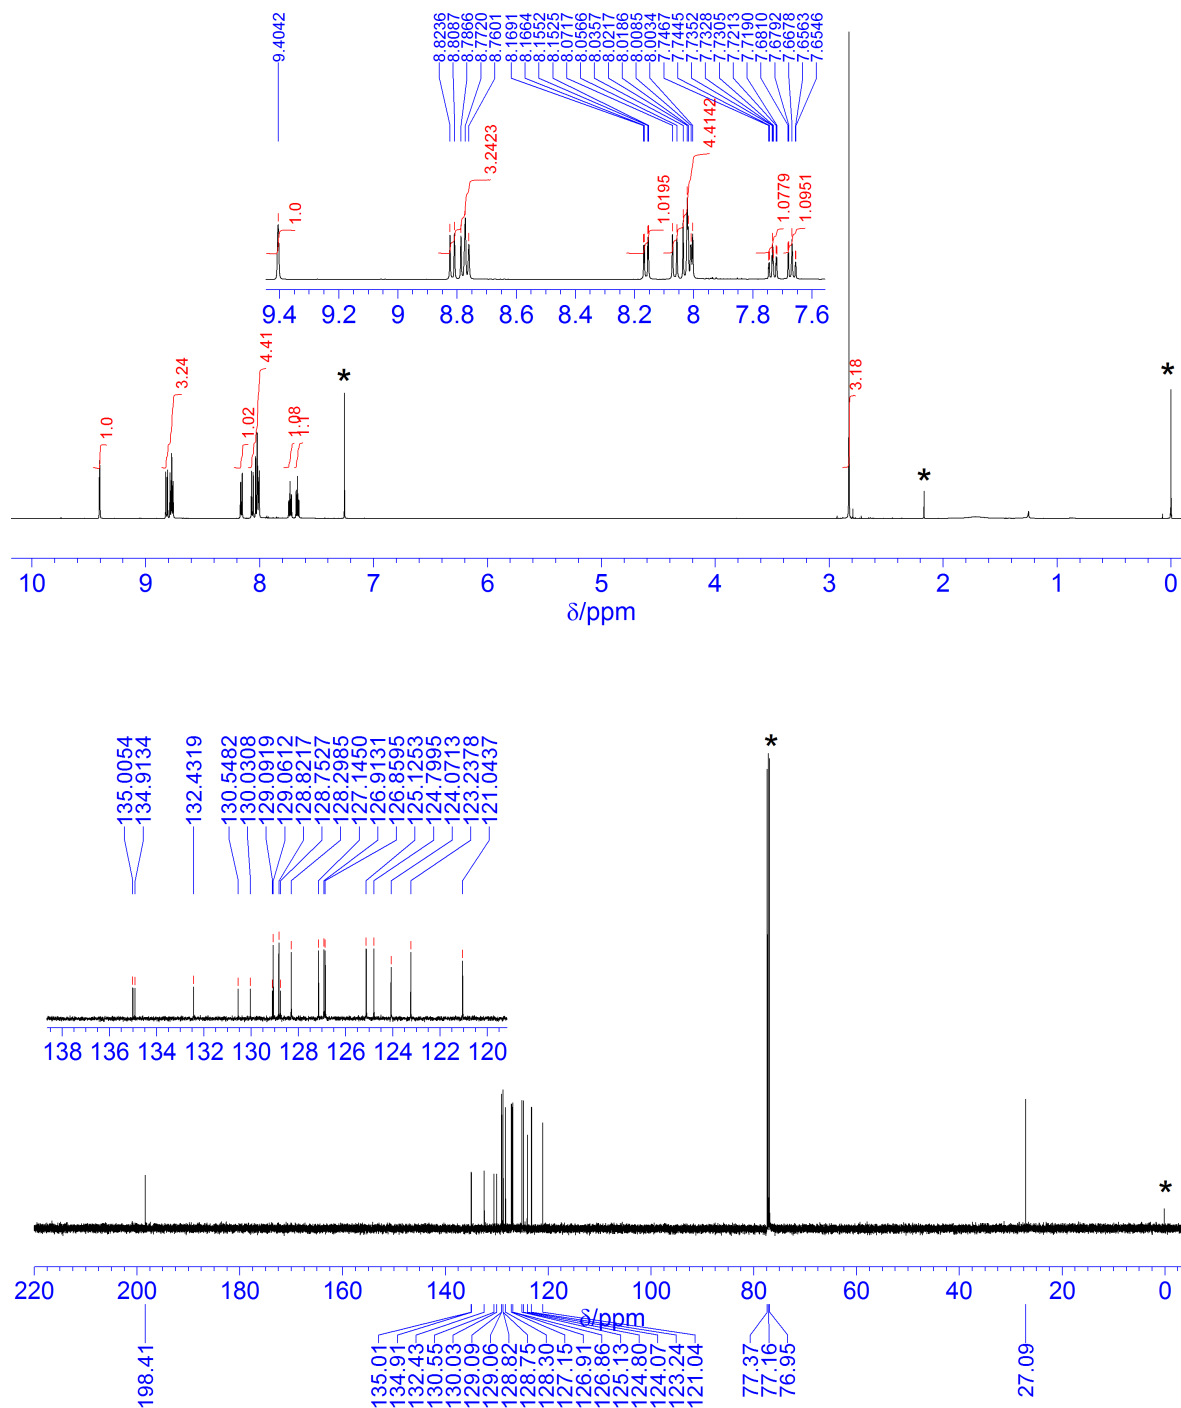

**Figure S9.** <sup>1</sup>H- (600 MHz) (upper) and <sup>13</sup>C (150 MHz) NMR spectra (lower) of **12** in CDCl<sub>3</sub>. The asterisked peaks are due to the solvent, TMS, and H<sub>2</sub>O included in the solvent.



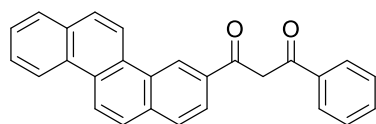

12

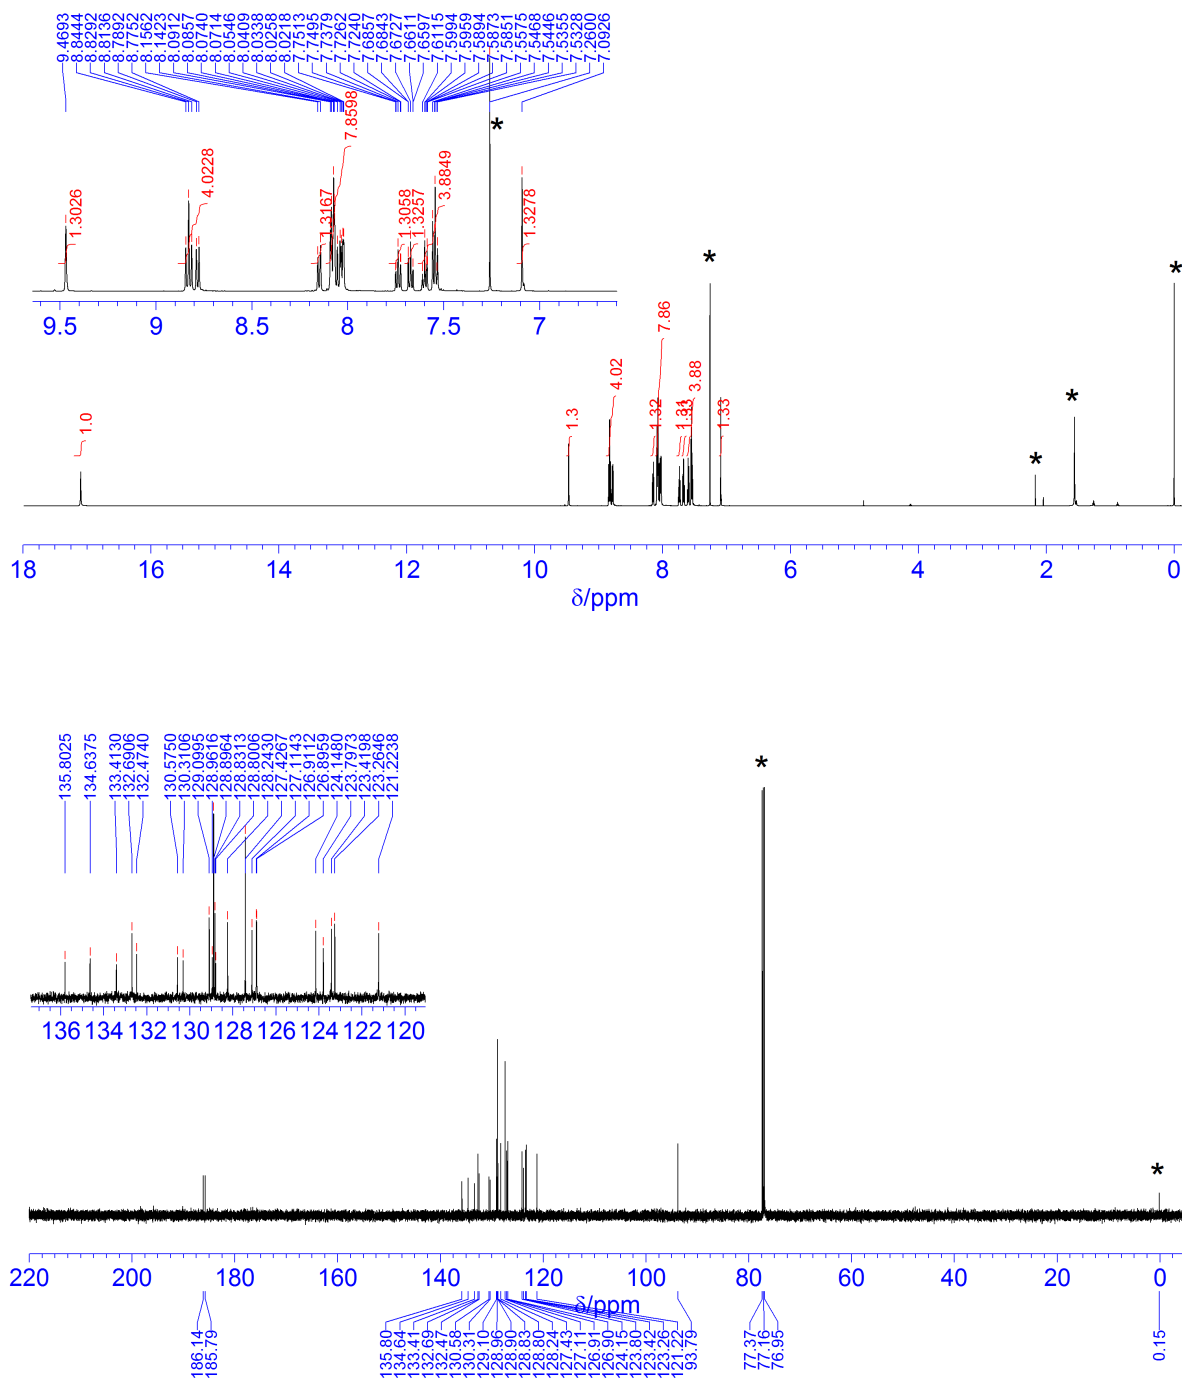

**Figure S10.** <sup>1</sup>H- (600 MHz) (upper) and <sup>13</sup>C (150 MHz) NMR spectra (lower) of **12** in CDCl<sub>3</sub>. The asterisked peaks are due to the solvent, TMS, H<sub>2</sub>O included in the solvent, and other impurity.



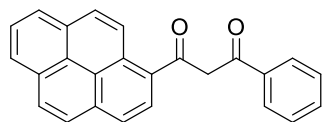

13

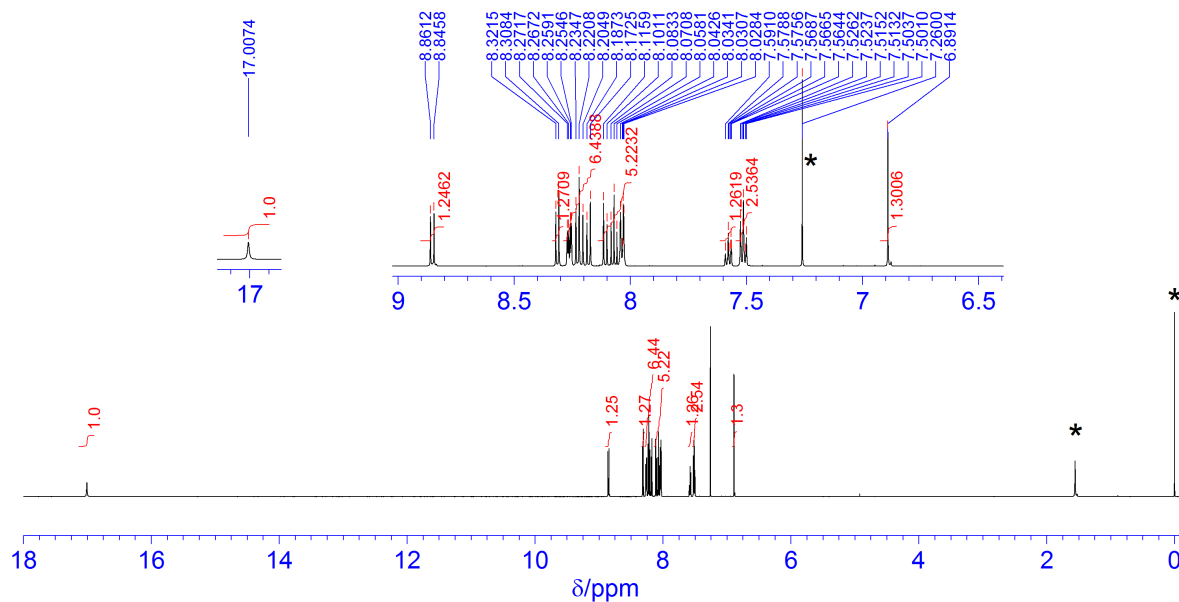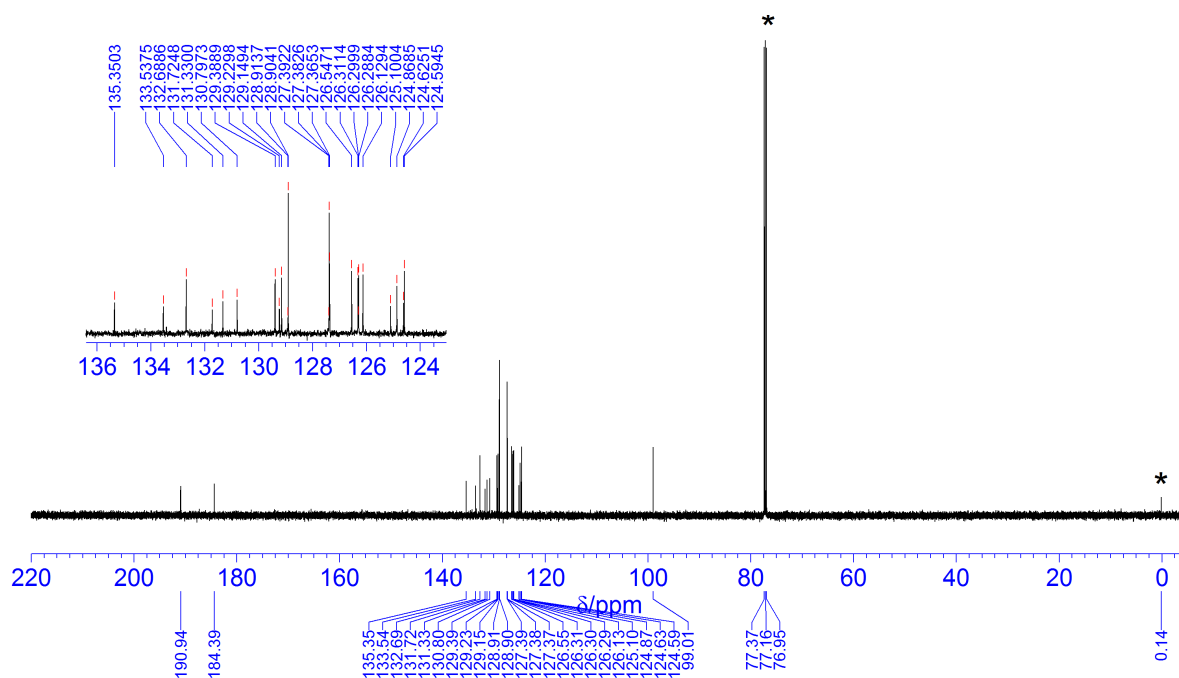

**Figure S12.**  $^1\text{H}$ - (600 MHz) (upper) and  $^{13}\text{C}$  (150 MHz) NMR spectra (lower) of **13** in  $\text{CDCl}_3$ . The asterisked peaks are due to the solvent, TMS, and  $\text{H}_2\text{O}$  included in the solvent.

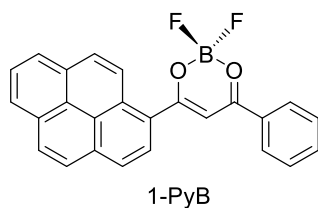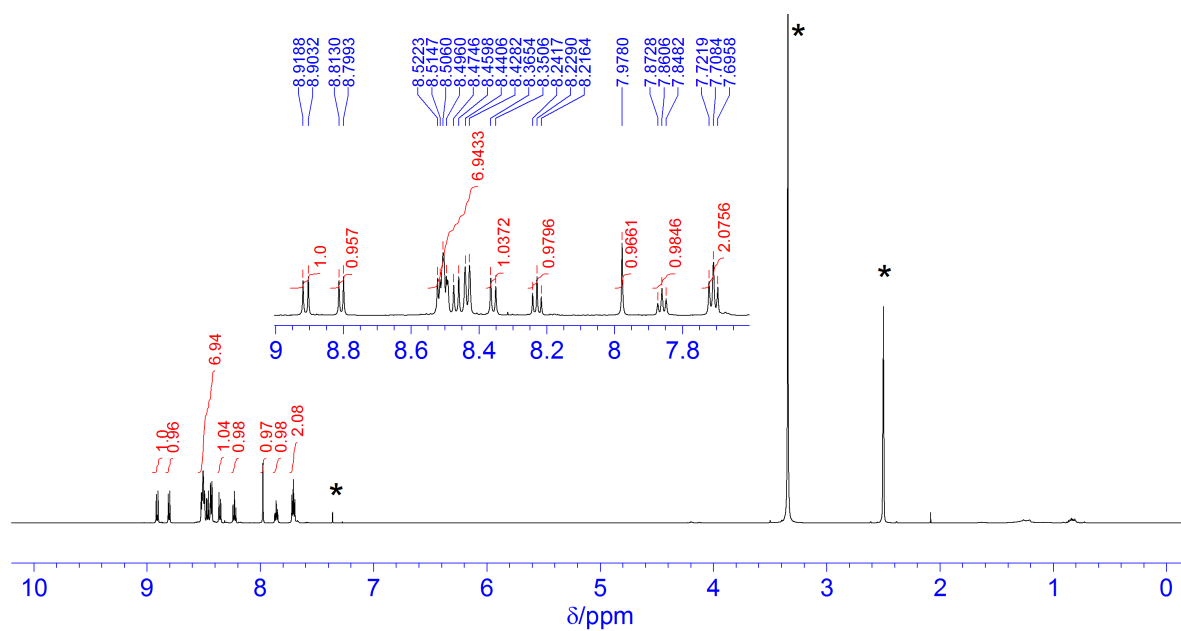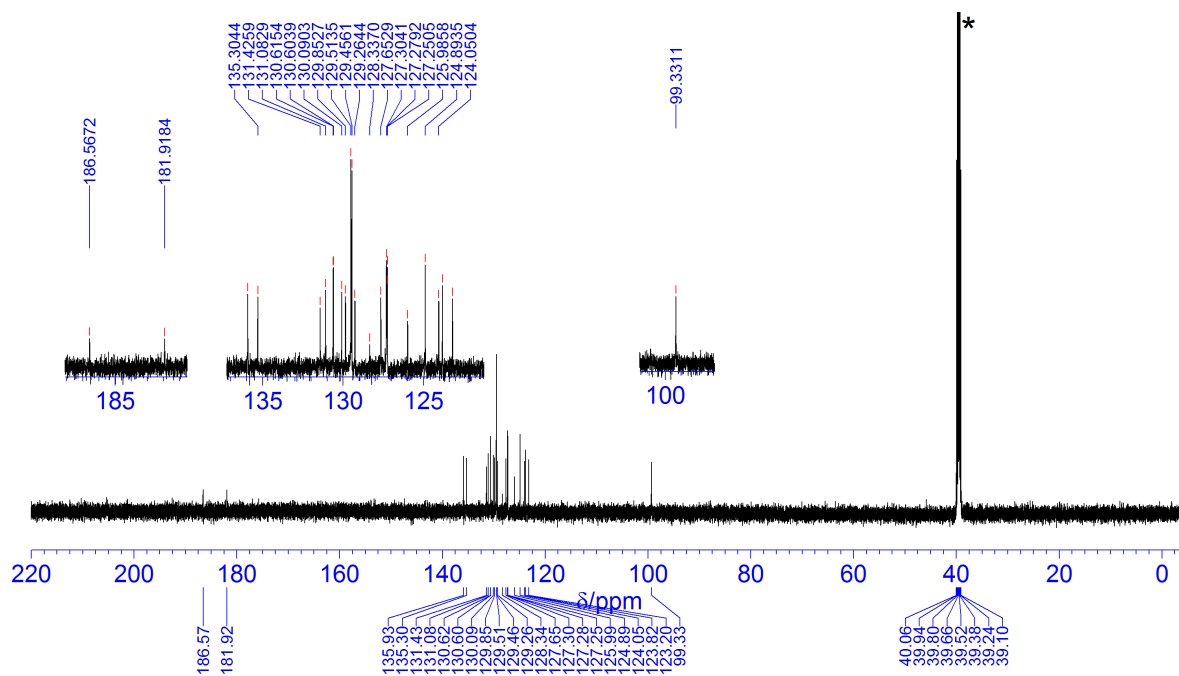

**Figure S13.**  $^1\text{H}$ - (600 MHz) (upper) and  $^{13}\text{C}$  (150 MHz) NMR spectra (lower) of 1-PyB in  $\text{DMSO-}d_6$ . The asterisked peaks are due to the solvent and  $\text{H}_2\text{O}$  included in the solvent.

## References

1. G. Drefahl, G. Plötner and K. Winnefeld, Untersuchungen über stilbene, XLII. [4-Vinyl-styryl]-aromaten, *Chem. Ber.*, 1961, **94**, 2002-2010.
2. H. Okamoto, T. Takane, S. Gohda, Y. Kubozono, K. Sato, M. Yamaji and K. Satake, Efficient synthetic photocyclization for phenacenes using a continuous flow reactor, *Chem. Lett.*, 2014, **43**, 994-996.
3. M. J. Frisch, G. W. Trucks, H. B. Schlegel, G. E. Scuseria, M. A. Robb, J. R. Cheeseman, G. Scalmani, V. Barone, B. Mennucci, G. A. Petersson, H. Nakatsuji, M. Caricato, X. Li, H. P. Hratchian, A. F. Izmaylov, J. Bloino, G. Zheng, J. L. Sonnenberg, M. Hada, M. Ehara, K. Toyota, R. Fukuda, J. Hasegawa, M. Ishida, T. Nakajima, Y. Honda, O. Kitao, H. Nakai, T. Vreven, J. J. A. Montgomery, J. E. Peralta, F. Ogliaro, M. Bearpark, J. J. Heyd, E. Brothers, K. N. Kudin, V. N. Staroverov, T. Keith, R. Kobayashi, J. Normand, K. Raghavachari, A. Rendell, J. C. Burant, S. S. Iyengar, J. Tomasi, M. Cossi, N. Rega, J. M. Millam, M. Klene, J. E. Knox, J. B. Cross, V. Bakken, C. Adamo, J. Jaramillo, R. Gomperts, R. E. Stratmann, O. Yazyev, A. J. Austin, R. Cammi, C. Pomelli, J. W. Ochterski, R. L. Martin, K. Morokuma, V. G. Zakrzewski, G. A. Voth, P. Salvador, J. J. Dannenberg, S. Dapprich, A. D. Daniels, O. Farkas, J. B. Foresman, J. V. Ortiz, J. Cioslowski and D. J. Fox, Gaussian 09, revision D.01, Gaussian, Inc., Wallingford CT, 2010.
